# Supplementary material
Source: PubMed Central journal article supplement (PMC5711439)
Supplement: kvir-08-07-1322240-s001.pdf [file kvir-08-07-1322240-s001.pdf]

**Table 3: Genes and their location in the genome predicted to be involved in Resistance and stress tolerance**

| Sl. No                                            | Drug class                      | Gene product                         | Gene                             | Function                                                   | Locus/ Protein ID                                                                                                                              |                                  |                        |
|---------------------------------------------------|---------------------------------|--------------------------------------|----------------------------------|------------------------------------------------------------|------------------------------------------------------------------------------------------------------------------------------------------------|----------------------------------|------------------------|
| <b>ResFinder analysis</b>                         |                                 |                                      |                                  |                                                            |                                                                                                                                                |                                  |                        |
|                                                   | Aminoglycosides                 | Streptomycin                         | <i>aadA</i>                      | Streptomycin 3'-adenylyltransferase                        | AHJ91630.1                                                                                                                                     |                                  |                        |
|                                                   | β-Lactam                        | class D β-lactamase                  | <i>bla<sub>OXA-66</sub></i>      | beta-lactamase                                             | AHJ93068.1                                                                                                                                     |                                  |                        |
|                                                   |                                 | class C β-lactamase                  | <i>ampC</i>                      | beta-lactamase                                             | AHJ94023.1                                                                                                                                     |                                  |                        |
|                                                   | Macrolide                       | Gentamicin                           | <i>Grm</i>                       | 16S rRNA methyltransferase                                 | AHJ93859.1                                                                                                                                     |                                  |                        |
|                                                   |                                 |                                      | <i>mph(E)</i>                    | macrolide 2'-phosphotransferase                            | AHJ93855.1                                                                                                                                     |                                  |                        |
|                                                   |                                 |                                      | <i>msr(E)</i>                    | ABC transporter                                            | AHJ93856.1                                                                                                                                     |                                  |                        |
|                                                   |                                 | Erythromycin                         | <i>msrA</i>                      | ATP-binding protein                                        | AHJ93856.1                                                                                                                                     |                                  |                        |
| <b>Manual search for resistance related genes</b> |                                 |                                      |                                  |                                                            |                                                                                                                                                |                                  |                        |
| Efflux pumps                                      | ABC (ATP binding cassette type) |                                      | <i>mlaD</i>                      | Phospholipid ABC transporter-binding protein               | AHJ94898.1, AHJ94724.1                                                                                                                         |                                  |                        |
|                                                   |                                 |                                      | <i>mlaE</i>                      | Phospholipid ABC transporter permease                      | AHJ94725.1, AHJ94899.1                                                                                                                         |                                  |                        |
|                                                   |                                 |                                      | <i>bepE</i>                      | Membrane transporter                                       | AHJ93962.1                                                                                                                                     |                                  |                        |
|                                                   |                                 |                                      | <i>yrbF</i>                      | Transporter - resistance to organic solvents               | AHJ94900.1, AHJ94726.1                                                                                                                         |                                  |                        |
|                                                   |                                 |                                      |                                  | RND Type Efflux Pump Involved In Aminoglycoside Resistance | AHJ94889.1, AHJ91476.1, AHJ93342.1, AHJ93952.1, AHJ94715.1, AHJ91475.1, AHJ92220.1, AHJ93363.1, AHJ93961.1, AHJ94418.1, AHJ95243.1, AHJ94345.1 |                                  |                        |
|                                                   |                                 | RND (Resistance-Nodulation-Division) |                                  |                                                            |                                                                                                                                                |                                  |                        |
|                                                   |                                 | MFS (Major Facilitator Superfamily)  |                                  | <i>arpC</i>                                                | outer membrane protein - Antibiotic efflux multidrug resistance protein                                                                        | AHJ93963.1                       |                        |
|                                                   |                                 |                                      |                                  | <i>emrB</i>                                                | Multidrug resistance protein B                                                                                                                 | AHJ93362.1                       |                        |
|                                                   |                                 |                                      |                                  | <i>Norm</i>                                                | Probable multidrug resistance protein norm                                                                                                     | AHJ91706.1, AHJ95212.1           |                        |
|                                                   |                                 |                                      |                                  | <i>mdtD</i>                                                | Putative multidrug resistance protein mdtD                                                                                                     | AHJ91682.1                       |                        |
|                                                   |                                 |                                      |                                  | <i>ybdA</i>                                                | Facilitator Superfamily Protein                                                                                                                | AHJ92081.1                       |                        |
|                                                   |                                 |                                      |                                  | <i>emrY</i>                                                | Facilitator Superfamily Protein                                                                                                                | AHJ92221.1, AHJ93399.1           |                        |
|                                                   |                                 |                                      |                                  | <i>nepI</i>                                                | Purine ribonucleoside efflux                                                                                                                   | AHJ91658.1                       |                        |
|                                                   |                                 |                                      | SMR (Small Multidrug Resistance) |                                                            | <i>mdfA</i>                                                                                                                                    | Efflux – Broad spectrum of drugs | AHJ94770.1, AHJ94944.1 |
|                                                   |                                 |                                      |                                  |                                                            | <i>emrB</i>                                                                                                                                    | Multidrug resistance protein B   | AHJ92308.1             |
|                                                   |                                 |                                      |                                  | <i>ydhJ</i>                                                | Multidrug resistance efflux pump                                                                                                               | AHJ91809.1                       |                        |

|                                 |                                               |               |                                                               |                                                      |                        |
|---------------------------------|-----------------------------------------------|---------------|---------------------------------------------------------------|------------------------------------------------------|------------------------|
|                                 | MATE (multidrug and toxic compound extrusion) | <i>norM</i>   | Probable multidrug resistance protein norM                    | AHJ91879.1                                           |                        |
| Glycopeptide<br>Polypeptide     |                                               | <i>yoeA</i>   | Probable multidrug resistance protein yoeA                    | AHJ95166.1                                           |                        |
|                                 | Chloramphenicol                               | <i>catB2</i>  | Acetyl transferase                                            | AHJ94372.1                                           |                        |
|                                 | Bleomycin                                     |               | Glyoxalase /Dioxygenase                                       | AHJ92301.1, AHJ95208.1                               |                        |
|                                 | Bacitracin                                    | <i>ybjG</i>   | Undecaprenyl diphosphatase                                    | AHJ91500.1                                           |                        |
|                                 |                                               | <i>uppP</i>   | Undecaprenyl pyrophosphate phosphatase                        | AHJ94448.1                                           |                        |
| Sulpha drugs                    | Polymyxin B                                   | <i>eptA</i>   | Phosphoethanolamine transferase eptA                          | AHJ92628.1                                           |                        |
|                                 | Albicidin                                     | <i>zntR</i>   | Albicidin resistance protein                                  | AHJ92771.1                                           |                        |
|                                 |                                               | <i>bcr</i>    | Sulfonamide And Bicyclomycin Resistance                       | AHJ94372.1                                           |                        |
|                                 |                                               | <i>folP-A</i> | Folic acid precursor synthesis                                | AHJ92485.1                                           |                        |
| Metals                          | Arsenic                                       | <i>arsR</i>   | Arsenical resistance operon repressor                         | AHJ93001.1                                           |                        |
|                                 |                                               | <i>arsC</i>   | Reduction of arsenate (As(V)) to arsenite(As(III))            | AHJ93000.1                                           |                        |
|                                 |                                               | <i>arsB</i>   | Arsenite resistance protein ArsB                              | AHJ93002.1                                           |                        |
|                                 | Copper                                        | <i>pcoB</i>   | Copper resistance protein B                                   | AHJ92138.1                                           |                        |
|                                 |                                               | <i>cutF</i>   | Copper Resistance Lipoprotein NlpE                            | AHJ92534.1                                           |                        |
|                                 |                                               | <i>copA</i>   | Copper resistance protein A homolog                           | AHJ92137.1                                           |                        |
|                                 | Co/Zn/Cd Efflux                               |               |                                                               | Cation Efflux Protein                                | AHJ92139.1             |
|                                 |                                               |               | <i>CzcC</i>                                                   | Cobalt-Zinc-Cadmium Resistance Protein               | AHJ95012.1, AHJ95012.1 |
|                                 |                                               |               | <i>CzcN</i>                                                   | Cobalt-zinc-cadmium resistance protein               | AHJ95015.1             |
|                                 |                                               |               | <i>czcA</i>                                                   | Cobalt-zinc-cadmium resistance protein               | AHJ95010.1, AHJ94835.1 |
| Tellurium                       |                                               |               | Cation Efflux Protein; Co/Zn/Cd Efflux System Component       | AHJ92640.1                                           |                        |
|                                 |                                               | <i>yoaE</i>   | tellurium resistance                                          | AHJ91684.1                                           |                        |
|                                 |                                               |               | Tellurite resistance protein – permease                       | AHJ91524.1                                           |                        |
|                                 |                                               | <i>alx</i>    | tellurium resistance                                          | AHJ91499.1                                           |                        |
|                                 | Mercury                                       | <i>merA</i>   | MerA protein is responsible for volatilizing mercury as Hg(0) | AHJ94611.1                                           |                        |
| Inorganic compounds<br>and dyes | Chromate                                      | <i>chrA1</i>  | Chromate transport protein                                    | AHJ93260.1                                           |                        |
|                                 | Toluene                                       | <i>ttg2D</i>  | Toluene tolerance protein                                     | AHJ94723.1, AHJ94897.1                               |                        |
|                                 | Quaternary ammonium compound                  |               | <i>qacF</i>                                                   | Quaternary ammonium compound-resistance protein qacF | AHJ93954.1             |
|                                 |                                               |               | <i>sugE</i>                                                   | Quaternary ammonium compound-resistance protein      | AHJ92140.1             |
|                                 |                                               |               | <i>emrE</i>                                                   | Quaternary ammonium compound-resistance protein      | AHJ94527.1             |
|                                 | Acriflavine                                   |               | <i>acrB</i>                                                   | Acriflavine resistance protein B                     | AHJ93338.1             |
|                                 |                                               |               | <i>acrA</i>                                                   | Acriflavine resistance protein A                     | AHJ94417.1             |
|                                 | DNA-Damaging Agents                           | <i>uspA</i>   | Required For Resistance To DNA-Damaging Agents                | AHJ94373.1                                           |                        |
|                                 | Azleucine                                     | <i>ygaZ</i>   | Predicted branched-chain amino acid permease                  | AHJ95075.1, AHJ93023.1, AHJ93978.1                   |                        |

|                                                    |                  |                                                                                                                       |                                                                                                                                                                                                             |            |
|----------------------------------------------------|------------------|-----------------------------------------------------------------------------------------------------------------------|-------------------------------------------------------------------------------------------------------------------------------------------------------------------------------------------------------------|------------|
| Stress tolerance                                   | Acid             | <i>ydeP</i>                                                                                                           | Probably involved in acid resistance                                                                                                                                                                        | AHJ94327.1 |
|                                                    | Camphor          | <i>crcB</i>                                                                                                           | Protein CrcB homolog                                                                                                                                                                                        | AHJ91873.1 |
|                                                    | Peroxide         | <i>ohrR</i>                                                                                                           | Organic hydroperoxide resistance transcriptional regulator                                                                                                                                                  | AHJ93439.1 |
|                                                    |                  | <i>perR</i>                                                                                                           | Peroxide resistance protein per                                                                                                                                                                             | AHJ92488.1 |
|                                                    | Serum resistance | <i>yadA</i>                                                                                                           | Responsible for agglutination, serum resistance, complement inactivation and phagocytosis resistance                                                                                                        |            |
| Transcriptional regulators of Multidrug resistance | Osmotic stress   | <i>BASYS01690</i>                                                                                                     | OsmC-Like Protein; Osmotically Inducible Protein                                                                                                                                                            | AHJ93074.1 |
|                                                    |                  | <i>ktrA</i>                                                                                                           | ktrAB potassium uptake transporter                                                                                                                                                                          | AHJ93546.1 |
|                                                    |                  | <i>ktrB</i>                                                                                                           | ktrAB potassium uptake transporter                                                                                                                                                                          | AHJ93547.1 |
|                                                    |                  | <i>ada</i>                                                                                                            | The methylation of Ada by methylphosphotriesters in DNA leads to its activation as a transcriptional regulator that activates the transcription of its own gene, ada, and other alkylation resistance genes | AHJ92307.1 |
|                                                    |                  | <i>marR</i>                                                                                                           | Transcriptional Repressor MprA; Transcriptional Repressor For Multidrug Resistance Pump; The Activation Of Both Antibiotic Resistance And Oxidative Stress Genes                                            | AHJ91804.1 |
|                                                    |                  | <i>vqsM</i>                                                                                                           | Putative regulatory proteins which are implicated in quorum sensing, virulence and multidrug resistance                                                                                                     | AHJ93494.1 |
|                                                    |                  | <i>ybfI</i>                                                                                                           | Transcriptional Activator Of Genes Involved In The Multiple Antibiotic Resistance (Mar) Phenotype. It Can Also Activate Genes Such As Soda, Zwf And Micf                                                    | AHJ93134.1 |
|                                                    |                  | <i>mrpG</i>                                                                                                           | Multiple resistance and pH homeostasis protein G                                                                                                                                                            | AHJ93884.1 |
|                                                    |                  | <i>tetR</i>                                                                                                           | TetR is the repressor of the tetracycline resistance element                                                                                                                                                | AHJ91827.1 |
|                                                    |                  | <i>ohrR</i>                                                                                                           | Organic hydroperoxide resistance transcriptional regulator                                                                                                                                                  | AHJ91707.1 |
|                                                    | <i>mprA</i>      | Transcriptional Regulator; Transcriptional Repressor MprA; Transcriptional Repressor Of For Multidrug Resistance Pump | AHJ92107.1                                                                                                                                                                                                  |            |

Figure 5

**ISAbal** insertions in the genome of *A. baumannii* PKAB07. The genetic co-ordinates of genes in the PKAB07 are illustrated where *ISAbal* insertions were present either in the upstream region or internal to the genes.

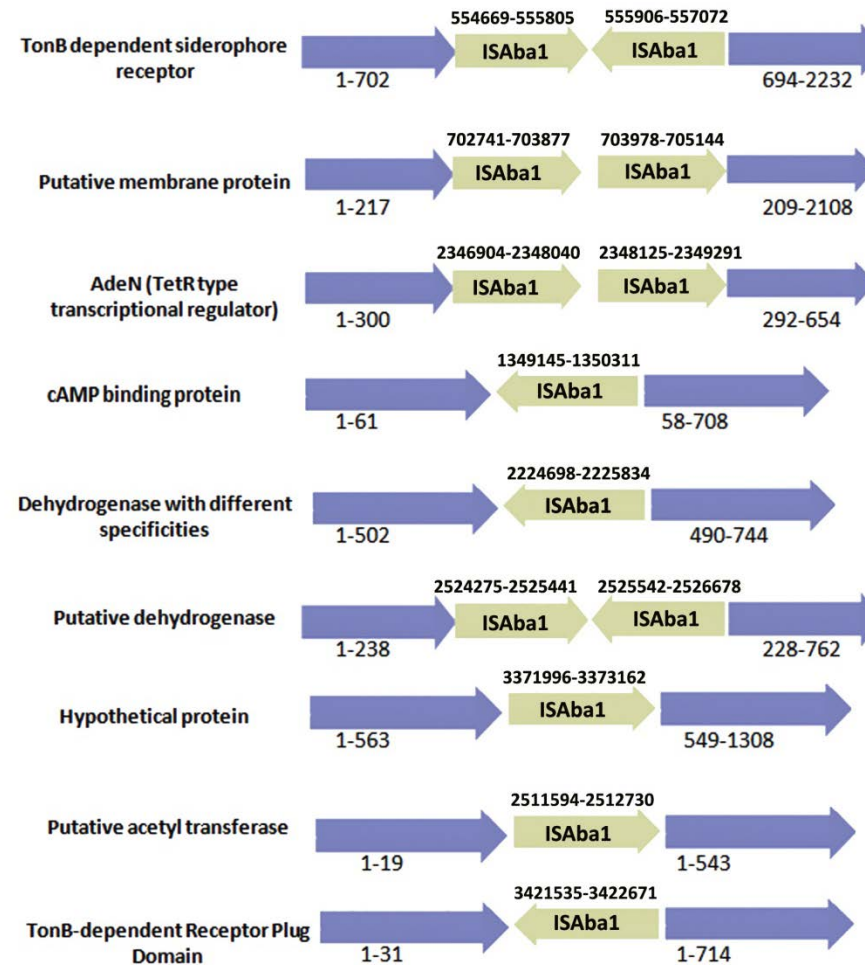

## Methodology for detection of Two-component system (TCS) in *A. baumannii* PKAB07

TCS members were identified by an exhaustive search of the entire gene set of *A. baumannii* PKAB07 to identify TCS members against the Conserved Domain Database for HK (Histidine kinase), RR (Response regulator) and PT (Phospho-transferase) domains. The genes that were found were searched against the P2CS database<sup>1</sup>. The probable hits were searched against InterProScan and The InterPro database to confirm the TCS members; HMM profiles corresponding to identify domains were used for HMMER searches. BLAST, Pfam, TMHMM 2.0 and Phyre fold recognition tool were used to predict the function of uncharacterized proteins (see flow chart below). Interacting partners were identified or predicted by extensive literature mining involving *Acinetobacter* or its close relatives *Pseudomonas*, *Burkholderia* and *Serratia* using STRING protein-protein interaction database, Gene Ontology Annotation (GOA) Database and the PubMed.

### FLOW CHART

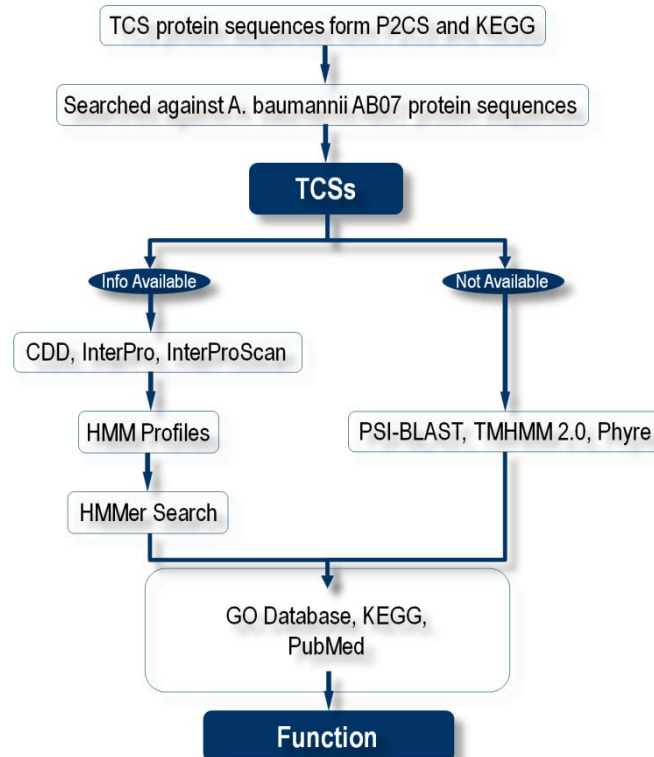

### Reference:

1. Barakat, M., Ortet, P., & Whitworth, D. E. (2011). P2CS: a database of prokaryotic two-component systems. *Nucleic acids research*, 39(suppl 1), D771-D776.

## Table - 1

### Main features of *A. baumannii* PKAB07 Genome

|                                                           |                                                                                                                                                                                               |
|-----------------------------------------------------------|-----------------------------------------------------------------------------------------------------------------------------------------------------------------------------------------------|
| GenBank ID                                                | CP006963.1                                                                                                                                                                                    |
| Genome size                                               | 4.23mb                                                                                                                                                                                        |
| Coding sequences                                          | 3772                                                                                                                                                                                          |
| Core genome                                               | 2.25mb (53%)                                                                                                                                                                                  |
| Accessory genome                                          | 1.98mb (47%)                                                                                                                                                                                  |
| Genes in core genome<br>(Important broad categories)      | Genes for heavy metal resistance, resistance to fluoroquinolones, $\beta$ -lactamases and MDR efflux pumps                                                                                    |
| Genes in accessory genome<br>(Important broad categories) | $\beta$ -lactamases, aminoglycoside modification enzymes, tetracycline resistance, transposable elements, phages and pro-phages, genes for biofilm formation and chaperone-usher pili pathway |
| # <i>ISAbal</i> copies                                    | 26                                                                                                                                                                                            |

### *Cell Viability Assay- AO/EB staining*

The A549 cells were seeded in a 12-well plate and the spent medium was replaced with fresh DMEM free of antibiotics. *A. baumannii* cells were grown overnight in LB broth, collected and re-suspended in DMEM without antibiotics. The bacterial cells were then added to the A549 monolayer at an MOI of **100**. The plates were then incubated for 24 h following which the medium was removed, washed twice with PBS and 20  $\mu$ l of AO/EB stain was added into the wells. The cells were observed under the fluorescent microscope B-2A filter (Nikon Eclipse TS100, Japan).

S 1

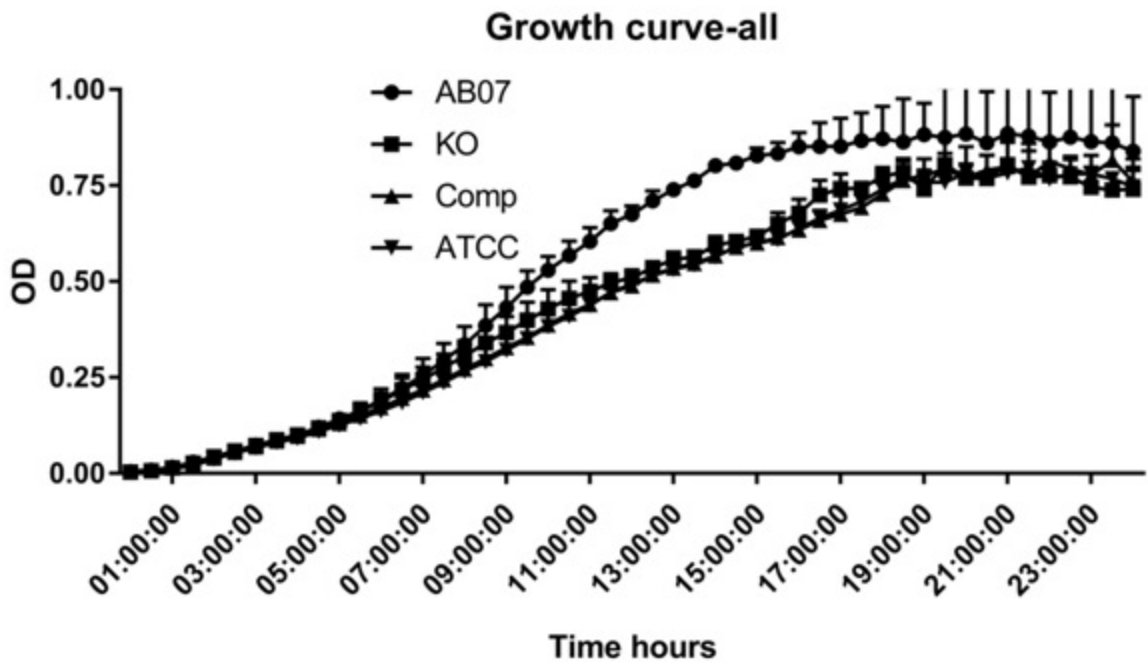

S1 – Growth rate analysis of *A. baumannii* strains

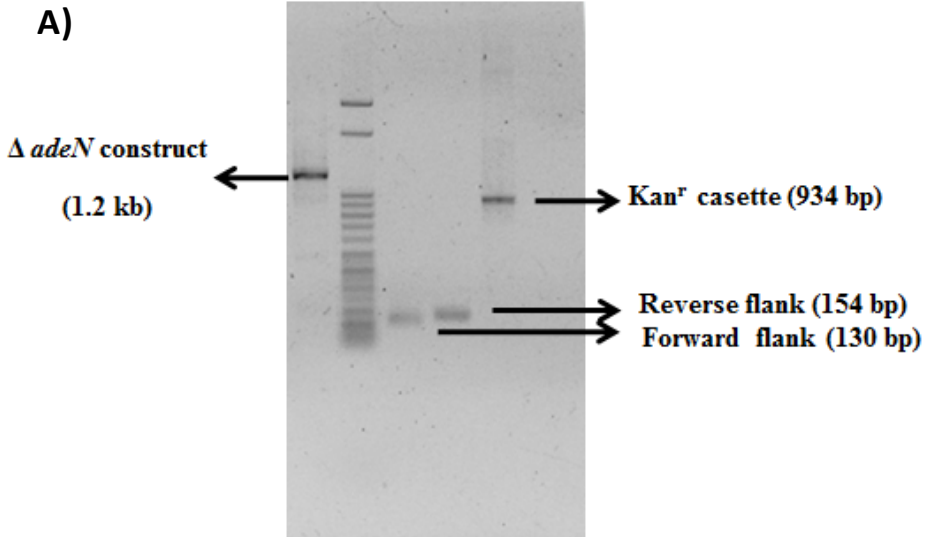

**Amplicons of *adeN* flanking regions, Kanamycin cassette and  $\Delta adeN$  construct (Kanamycin cassette flanked with *adeN*).** Lane 1:  $\Delta adeN$  construct carrying upstream and downstream regions of *adeN* and kanamycin resistance cassette; Lane M: 3Kb DNA ladder (Sigma Aldrich, USA), Lane 2, 3 & 4 Forward flanking, reverse flanking regions of *adeN* and kanamycin resistance cassette.

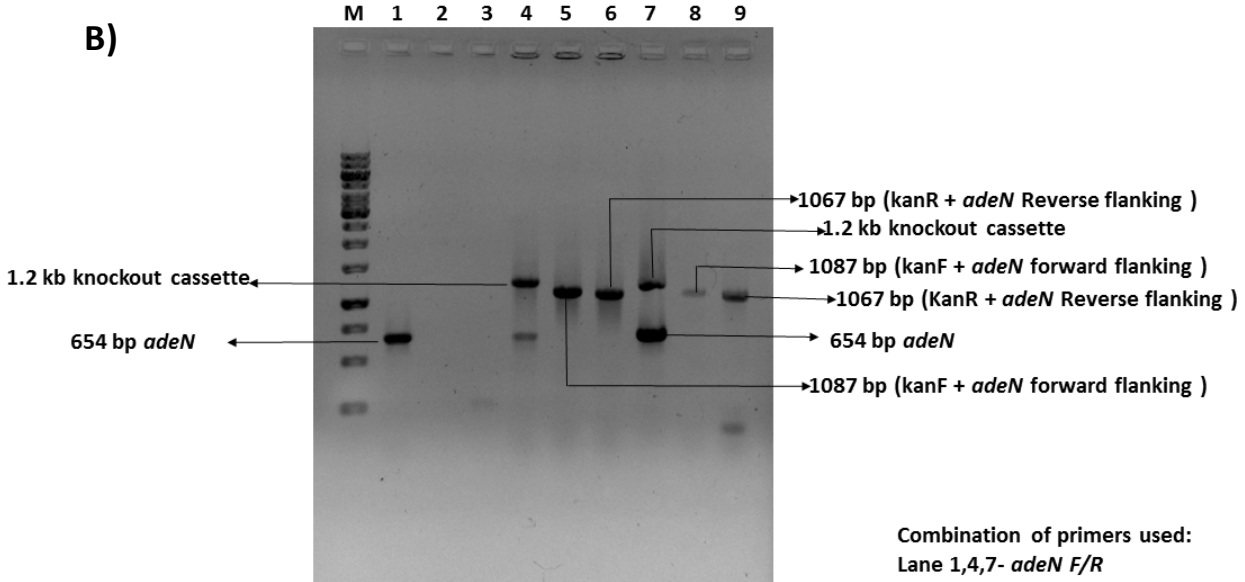

Combination of primers used:  
 Lane 1,4,7- *adeN* F/R  
 Lane 2,5,8- kan F/*adeN* R  
 Lane 3,6,9- *adeN* F/kan R

Lane M: Marker, Lane 1-3:ATCC, Lane 4-6: Knockout, Lane7-9 : Complement



S 3

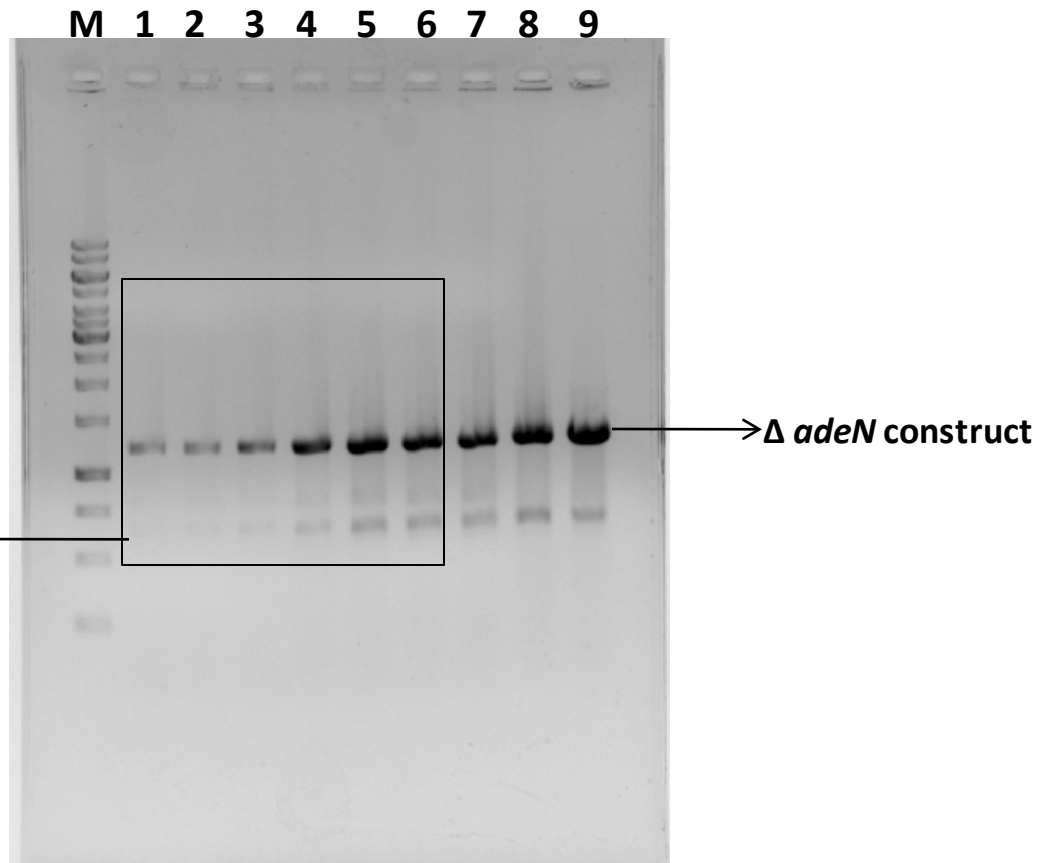

**Time lapse Colony PCR**

**M – Maker ; Lane 1 to 10 Cultures of  $\Delta adeN$  strain grown at 2h, 4h, 6h, 8h, 10h, 12h, 24h and 48h subjected to Time lapse colony PCR to amplify the knock out construct of *adeN* (1.2kb)**
